# Supplementary material for: 3D Printed Piezoelectric BaTiO3/Polyhydroxybutyrate Nanocomposite Scaffolds for Bone Tissue Engineering
Source: MDPI journal article supplement (doi:10.3390/bioengineering11020193), 2024-02-17
Supplement: s1 [file s1]

Supplementary

# 3D printed piezoelectric BaTiO<sub>3</sub>/polyhydroxybutyrate nanocomposite scaffolds for bone tissue engineering

Giovanna Strangis <sup>1</sup>, Massimiliano Labardi <sup>2</sup>, Giuseppe Gallone <sup>1,\*</sup>, Mario Milazzo <sup>1</sup>, Simone Capaccioli <sup>2,3</sup>,  
Francesca Forli <sup>4</sup>, Patrizia Cinelli <sup>1,2</sup>, Stefano Berrettini <sup>4</sup>, Maurizia Seggiani <sup>1</sup>, Serena Danti <sup>1,2,†,\*</sup> and Paolo Parchi <sup>5,†</sup>

<sup>1</sup> Dept. of Civil and Industrial Engineering, University of Pisa, Largo L. Lazzarino 2, 56122 Pisa, Italy; giovanna.strangis@phd.unipi.it (G.S.); mario.milazzo@unipi.it (M.M.); patrizia.cinelli@unipi.it (P.C.); maurizia.seggiani@unipi.it (M.S.);

<sup>2</sup> Institute for Chemical and Physical Processes (IPCF), National Researches Council (CNR), Pisa Research Area, via Moruzzi 1, 56124 Pisa, Italy; labardi@df.unipi.it (M.L.);

<sup>3</sup> Dept. of Physics “Enrico Fermi”, Largo Pontecorvo 3, 56127 Pisa, Italy; simone.capaccioli@unipi.it (S.C.);

<sup>4</sup> Dept. of Surgical, Medical, Molecular Pathology and Emergency Medicine, University of Pisa, 56126 Pisa, Italy; francesca.forli@unipi.it (F.F.); s.berrettini@med.unipi.it (S.B.);

<sup>5</sup> Dept. of Translational Research and New technologies in Medicine and Surgery, University of Pisa, Pisa, Italy; paolo.parchi@unipi.it (P.P.)

<sup>†</sup> These authors contributed equally to this work.

\* Correspondence: giuseppe.gallone@unipi.it (G.G.); serena.danti@unipi.it (S.D.)

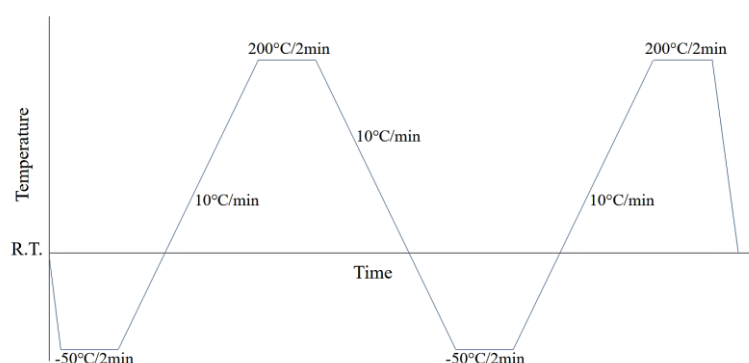

**Figure S1.** Thermal treatment program applied for all DSC measurements reported in present work.

**Citation:** To be added by editorial staff during production.

Academic Editor: Firstname Last-name

Received: date

Revised: date

Accepted: date

Published: 17 February 2024

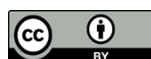

**Copyright:** © 2024 by the authors. Licensee MDPI, Basel, Switzerland. This article is an open access article distributed under the terms and conditions of the Creative Commons Attribution (CC BY) license (<https://creativecommons.org/licenses/by/4.0/>).

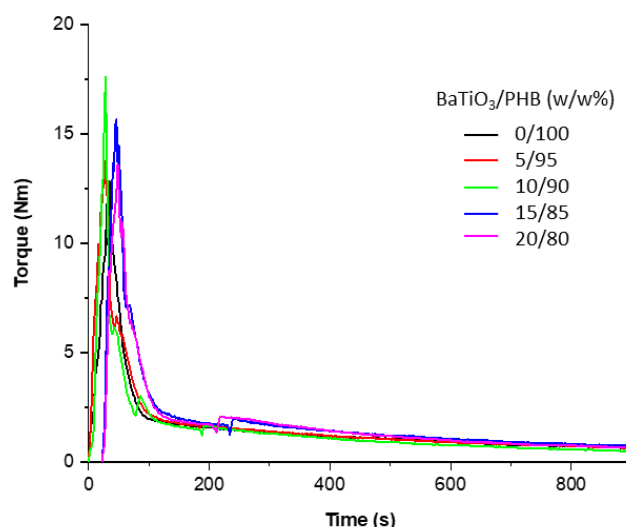

**Figure S2.** Torque vs. time during PHB and BaTiO<sub>3</sub>/PHB nanocomposite mixing. The investigation of torque was carried out in a Brabender mixer in conjunction with the WinMix program, to know the mechanical and thermal effects.

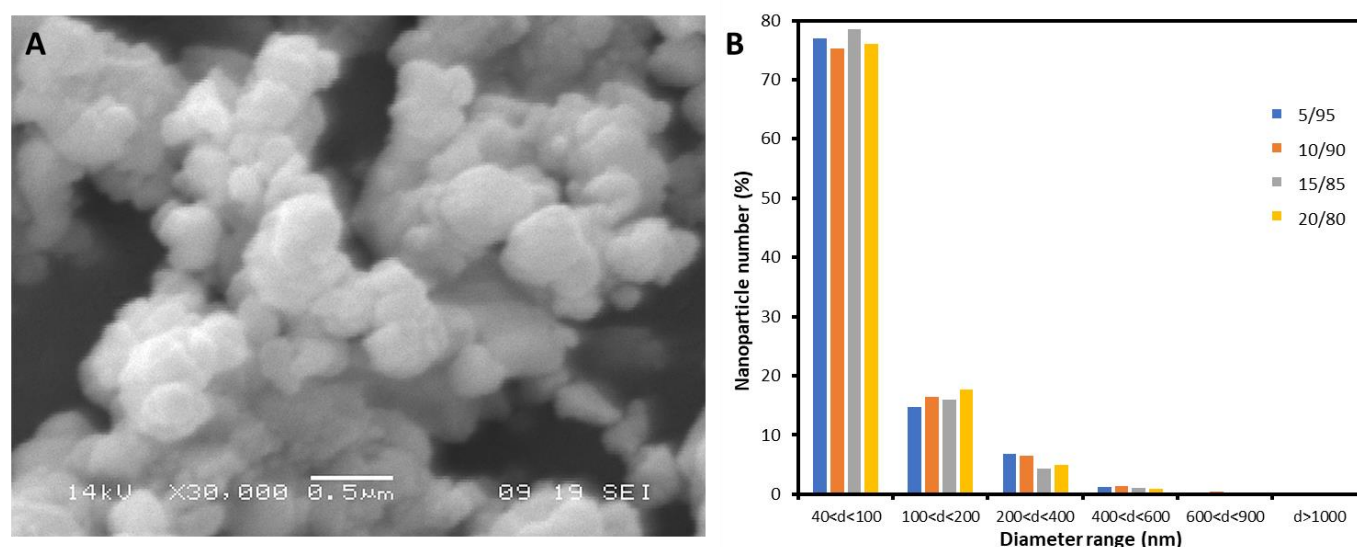

**Figure S3.** BaTiO<sub>3</sub> nanoparticles: (A) Scanning electron microscopy (SEM) micrographs of the particles as supplied; (B) Nanoparticle frequency (%) *vs* diameter range (nm), as detected at the surfaces of the different PHB BaTiO<sub>3</sub>/PHB nanocomposites via SEM analysis, evaluated using ImageJ software.

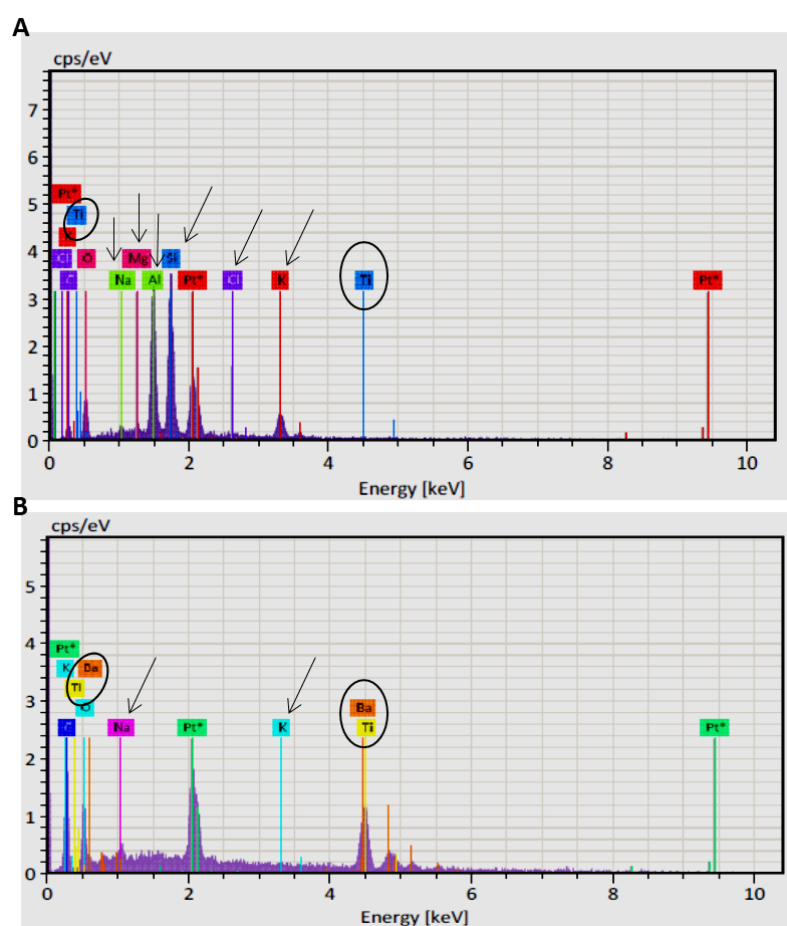

**Figure S4.** Elemental analysis (EDX) performed on: (A) 5/95 (w/w%) PHB BaTiO<sub>3</sub>/PHB and 10/90 (w/w%) PHB BaTiO<sub>3</sub>/PHB nanocomposites confirmed the presence of BaTiO<sub>3</sub> nanoparticles by the detection of Ba and Ti (circles), and also showed the presence of some impurities, like sodium, potassium, magnesium, aluminum and chlorine (arrows). \* indicates the element (i.e., Pt) added for sputter coating the surface.

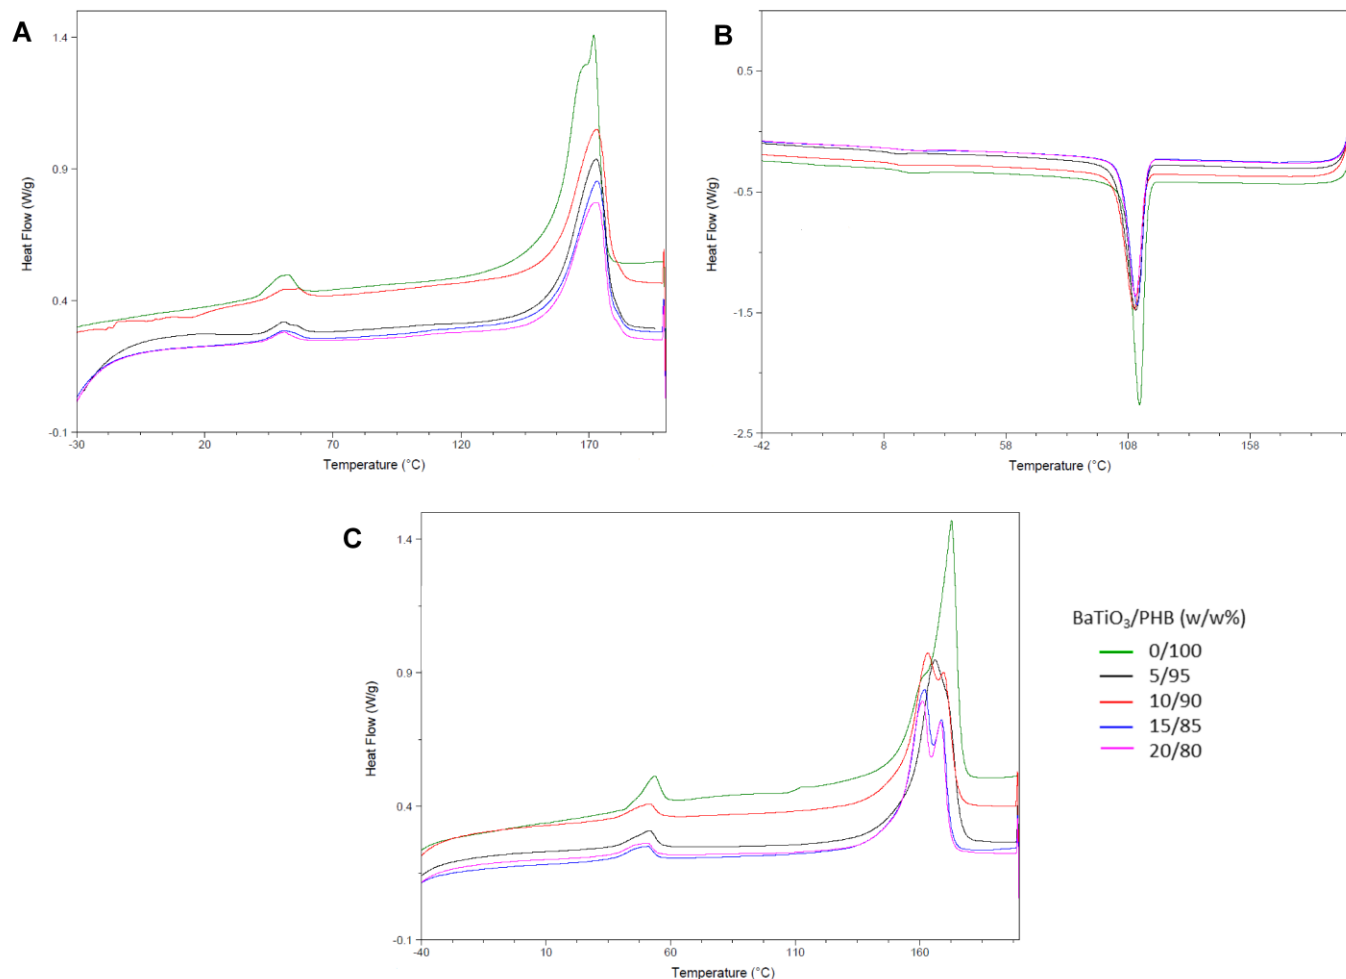

**Figure S5.** Differential scanning calorimetry (DSC) thermograms of PHB and BaTiO<sub>3</sub>/PHB nanocomposites: (A) First heating; (B) Cooling; and (C) second heating curves.

**Disclaimer/Publisher's Note:** The statements, opinions and data contained in all publications are solely those of the individual author(s) and contributor(s) and not of MDPI and/or the editor(s). MDPI and/or the editor(s) disclaim responsibility for any injury to people or property resulting from any ideas, methods, instructions or products referred to in the content.
